# Supplementary material for: School Playground Surfacing and Arm Fractures in Children: A Cluster Randomized Trial Comparing Sand to Wood Chip Surfaces
Source: PLoS Med. 2009 Dec 15;6(12):e1000195. doi: 10.1371/journal.pmed.1000195 (PMC2784292; doi:10.1371/journal.pmed.1000195)
Supplement: Text S2 — CONSORT statement checklist. (0.07 MB PDF) [file pmed.1000195.s002.pdf]

[\[ Print \]](#)[\[ Close \]](#)**School playground surfacing - a randomised prospective comparison of injury rates on granite sand versus wood chip surfaces**

|                                          |                                                                                                                                                                                          |
|------------------------------------------|------------------------------------------------------------------------------------------------------------------------------------------------------------------------------------------|
| <b>ISRCTN</b>                            | ISRCTN02647424                                                                                                                                                                           |
| <b>ClinicalTrials.gov identifier</b>     | NCT00213174                                                                                                                                                                              |
| <b>Public title</b>                      | School playground surfacing - a randomised prospective comparison of injury rates on granite sand versus wood chip surfaces                                                              |
| <b>Scientific title</b>                  |                                                                                                                                                                                          |
| <b>Acronym</b>                           | N/A                                                                                                                                                                                      |
| <b>Serial number at source</b>           | MCT-70318                                                                                                                                                                                |
| <b>Study hypothesis</b>                  | Injury rates (arm fracture, head injury and other injuries) among school children are equal on granitic sand and wood fibre (fibar) playground surfaces.                                 |
| <b>Ethics approval</b>                   | Ethics approval received from the Hospital for Sick Children - University of Toronto - Research Ethics Board, on the 14th May 2004.                                                      |
| <b>Study design</b>                      | Randomised controlled trial                                                                                                                                                              |
| <b>Countries of recruitment</b>          | Canada                                                                                                                                                                                   |
| <b>Disease/condition/study domain</b>    | Children's fractures from falling off play equipment.                                                                                                                                    |
| <b>Participants - inclusion criteria</b> | <ol style="list-style-type: none"> <li>1. School children</li> <li>2. Ages 5 - 11, either sex</li> <li>3. Injured on falls from play equipment during supervised school hours</li> </ol> |
| <b>Participants - exclusion criteria</b> | Children injured when school is not in session.                                                                                                                                          |
| <b>Anticipated start date</b>            | 01/01/2005                                                                                                                                                                               |
| <b>Anticipated end date</b>              | 31/12/2006                                                                                                                                                                               |
| <b>Status of trial</b>                   | Completed                                                                                                                                                                                |
| <b>Patient information material</b>      |                                                                                                                                                                                          |
| <b>Target number of participants</b>     | 34 schools                                                                                                                                                                               |
| <b>Interventions</b>                     | Granite sand playground surfaces versus wood fibre engineered playground surfaces.                                                                                                       |
| <b>Primary outcome measure(s)</b>        | Fracture rates, upper extremity                                                                                                                                                          |
| <b>Secondary outcome measure(s)</b>      | Head injury, all injury                                                                                                                                                                  |
| <b>Sources of funding</b>                | Canadian Institutes of Health Research (CIHR) (Canada) - <a href="http://www.cihr-irsc.gc.ca">http://www.cihr-irsc.gc.ca</a> (ref: MCT-70318)                                            |
| <b>Trial website</b>                     |                                                                                                                                                                                          |
| <b>Publications</b>                      |                                                                                                                                                                                          |
| <b>Contact name</b>                      | <b>Dr Andrew William Howard</b>                                                                                                                                                          |
| <b>Address</b>                           | Hospital for Sick Children                                                                                                                                                               |

|              |                                                                                   |
|--------------|-----------------------------------------------------------------------------------|
|              | Orthopaedic Surgery and Population Health<br>555, University Avenue<br>Room S-107 |
| City/town    | Toronto, Ontario                                                                  |
| Zip/Postcode | M5G 1X8                                                                           |
| Country      | Canada                                                                            |
| Tel          | +1 416 813 6439                                                                   |
| Fax          | +1 416 813 6414                                                                   |
| Email        | andrew.howard@sickkids.ca                                                         |

---

|                |                                              |
|----------------|----------------------------------------------|
| <b>Sponsor</b> | Hospital for Sick Children, Toronto (Canada) |
| Address        | 555 University Avenue                        |
| City/town      | Toronto, Ontario                             |
| Zip/Postcode   | M5G 1X8                                      |
| Country        | Canada                                       |
| Tel            | +1 416 813 1500                              |
| Fax            | +1 416 813 5393                              |
| Email          | andrew.howard@sickkids.ca                    |

---

|                     |            |
|---------------------|------------|
| <b>Date applied</b> | 10/08/2005 |
|---------------------|------------|

|                    |            |
|--------------------|------------|
| <b>Last edited</b> | 11/12/2007 |
|--------------------|------------|

|                             |            |
|-----------------------------|------------|
| <b>Date ISRCTN assigned</b> | 10/08/2005 |
|-----------------------------|------------|

---
